# Supplementary material
Source: JCI journal article supplement (doi:10.1172/jci152761)
Supplement: sd1 [file 1]

**SUPPLEMENTARY FIGURES**

**SUPPLEMENTARY FIGURE S1**

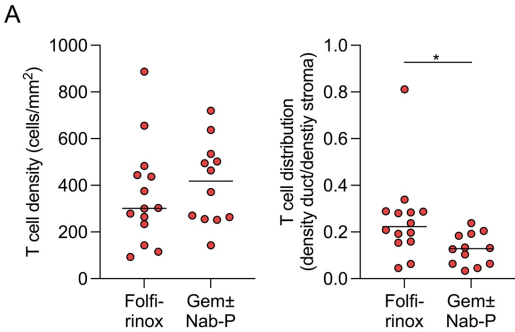

### **Supplementary Figure. S1**

(A) Quantification of T cell density in whole PDAC and distribution (density duct/density stroma) of NEO patients treated with FOLF (FOLFIRINOX or FOLFOXIRI; n = 14) and Gemcitabine (Gem) with or without Nab-Paclitaxel (Nab-Pac; n = 12). Each point represents data from one patient. Data, median. Unpaired two-tailed *t* tests. \*,  $p < 0.05$ .

SUPPLEMENTARY FIGURE S2

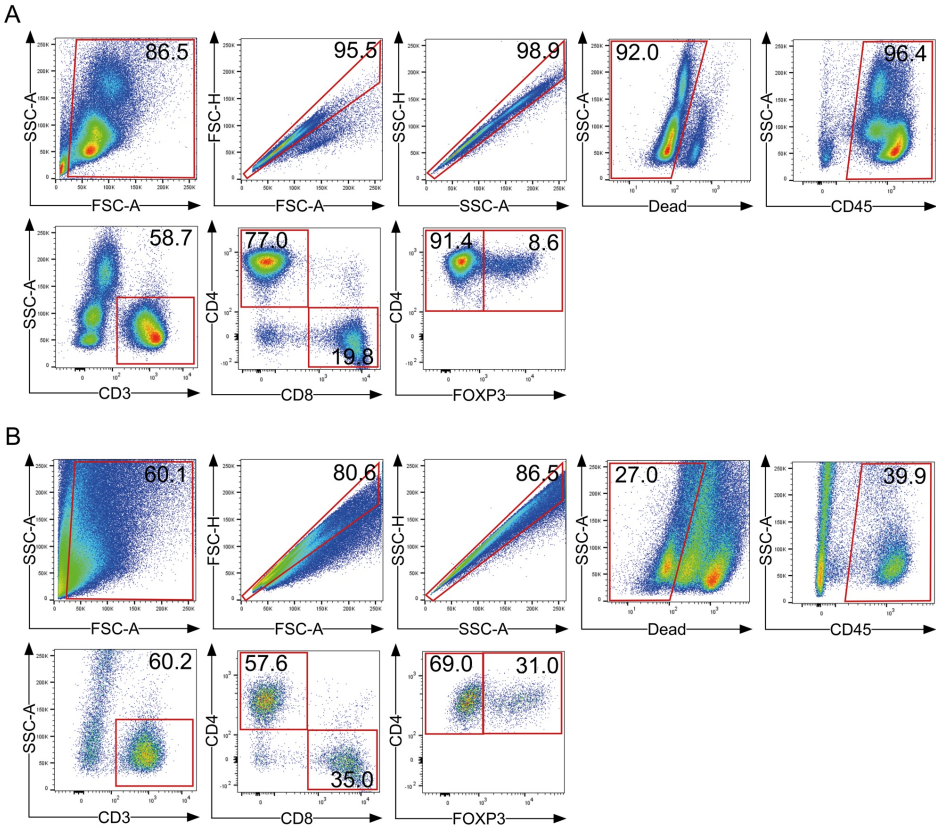

**Supplementary Figure. S2**

(A) Representative flow cytometric gating strategy for the identification of T cells in blood and (B) tumor samples from patients with PDAC. Numbers indicate percentage of population per gate. SSC, side scatter; FSC, forward scatter.

SUPPLEMENTARY FIGURE S3

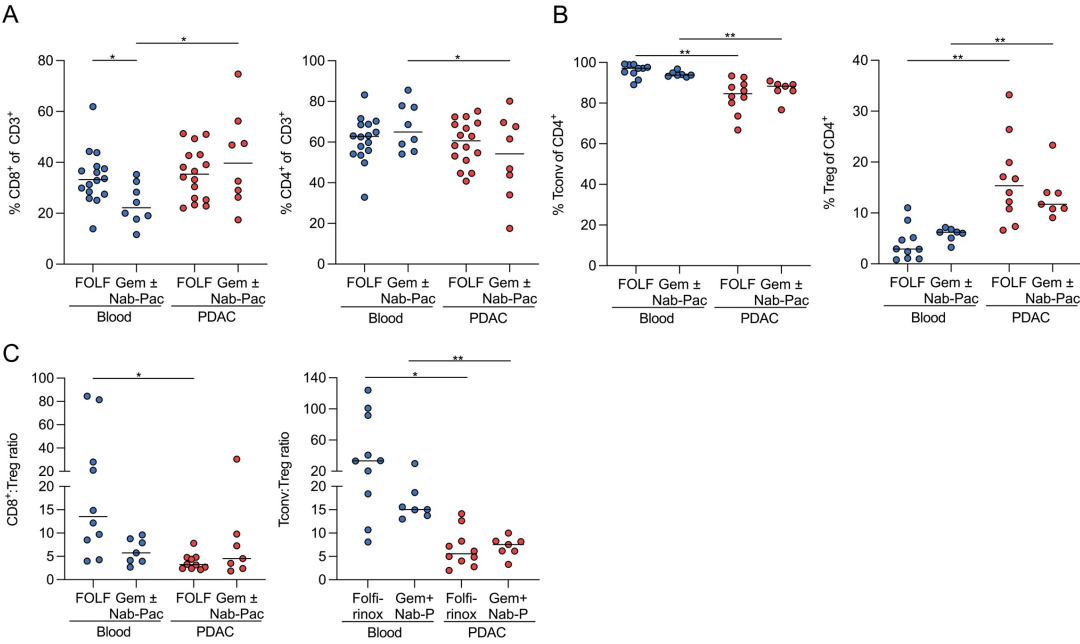

### Supplementary Figure. S3

(A) Quantification of CD8<sup>+</sup> (left) and CD4<sup>+</sup> (right) among all CD3<sup>+</sup> T cells and (B) conventional CD4<sup>+</sup> T (Tconv; CD4<sup>+</sup>FOXP3<sup>-</sup>; left) and regulatory T (Treg) cells (CD4<sup>+</sup>FOXP3<sup>+</sup>; right) among all CD4<sup>+</sup> T cells. (C) Ratio of CD8<sup>+</sup> T to Treg cells (left) and CD4<sup>+</sup> Tconv to Treg cells (right). Each point represents data from one NEO patient. FOLF, FOLFIRINOX or FOLFOXIRI, folinic acid, 5-fluorouracil, oxaliplatin, and irinotecan; Gem, gemcitabine; Nab-Pac, nab-paclitaxel. Data, median. Unpaired two-tailed *t* test and paired two-tailed *t* test, respectively. \*,  $p < 0.05$ ; \*\*,  $p < 0.01$ .

SUPPLEMENTARY FIGURE S4

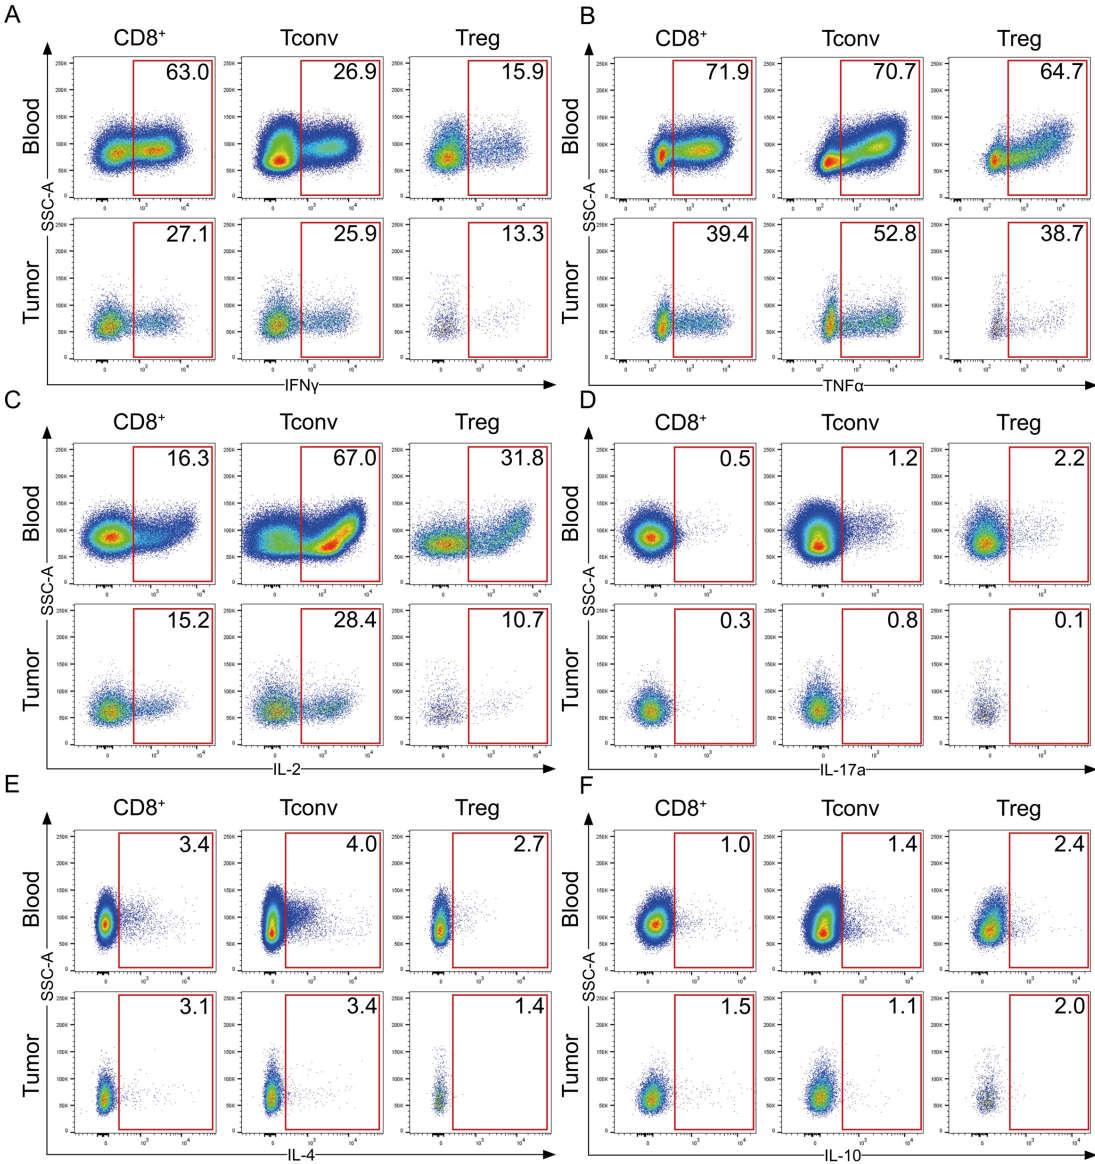

**Supplementary Figure. S4**

(A-F) Representative flow cytometric gating for indicated cytokine production by indicated T cell subset in blood and tumor samples from patients with PDAC. Numbers indicate percentage of population per gate.

## SUPPLEMENTARY TABLES

**Table S1.** Clinicopathologic characteristics of patients in multiplex immunofluorescence cohort.

| <b>Variable</b>   | <b>PR (n = 62)<br/>n (%)</b> | <b>NEO (n = 29)<br/>n (%)</b> | <b>p value</b> |
|-------------------|------------------------------|-------------------------------|----------------|
| <b>Age</b>        |                              |                               |                |
| Median (Range)    | 70 (47-80)                   | 67 (36-78)                    | 0.3214         |
| <b>Gender</b>     |                              |                               |                |
| Male              | 31 (50)                      | 14 (48)                       | 0.9999         |
| Female            | 31 (50)                      | 15 (52)                       |                |
| <b>pT</b>         |                              |                               |                |
| 1                 | 5 (8)                        | 3 (10)                        | 0.4093         |
| 2                 | 38 (61)                      | 14 (48)                       |                |
| 3                 | 18 (29)                      | 10 (35)                       |                |
| 4                 | 1 (2)                        | 2 (7)                         |                |
| <b>pN</b>         |                              |                               |                |
| 0                 | 24 (39)                      | 8 (28)                        | 0.2401         |
| 1                 | 22 (35)                      | 16 (55)                       |                |
| 2                 | 16 (26)                      | 5 (17)                        |                |
| <b>pM</b>         |                              |                               |                |
| 0                 | 61 (98)                      | 22 (76)                       | 0.0012         |
| 1                 | 1 (2)                        | 7 (24)                        |                |
| <b>UICC Stage</b> |                              |                               |                |
| I                 | 3 (5)                        | 3 (10)                        | 0.0089         |
| II                | 43 (69)                      | 13 (45)                       |                |
| III               | 15 (24)                      | 6 (21)                        |                |
| IV                | 1 (2)                        | 7 (24)                        |                |

**Table S2.** Clinicopathologic characteristics of neoadjuvantly treated patients in multiplex immunofluorescence cohort. FOLF, FOLFIRINOX or FOLFOXIRI, folinic acid, 5-fluorouracil, oxaliplatin, and irinotecan; Gem, gemcitabine; Nab-Pac, nab-paclitaxel; OX, oxaliplatin.

| <b>Variable</b>                   | <b>Gem</b><br><br><b>(n = 3)</b> | <b>Gem<br/>+<br/>Nab-Pac</b><br><br><b>(n = 8)</b> | <b>Gem<br/>+<br/>OX</b><br><br><b>(n = 1)</b> | <b>FOLFIRINOX<br/>or<br/>FOLFOXIRI</b><br><br><b>(n = 14)</b> | <b>FOLF<br/>+<br/>Gem<br/>+<br/>Nab-Pac</b><br><br><b>(n = 3)</b> |
|-----------------------------------|----------------------------------|----------------------------------------------------|-----------------------------------------------|---------------------------------------------------------------|-------------------------------------------------------------------|
| <b>Age</b>                        |                                  |                                                    |                                               |                                                               |                                                                   |
| Median (Range)                    | 64 (36-74)                       | 73 (59-78)                                         | 75                                            | 64 (60-76)                                                    | 68 (68)                                                           |
| <b>Gender</b>                     |                                  |                                                    |                                               |                                                               |                                                                   |
| Male                              | 1                                | 4                                                  | 0                                             | 8                                                             | 1                                                                 |
| Female                            | 2                                | 4                                                  | 1                                             | 6                                                             | 2                                                                 |
| <b>UICC Stage</b>                 |                                  |                                                    |                                               |                                                               |                                                                   |
| I                                 | 0                                | 1                                                  | 0                                             | 2                                                             | 0                                                                 |
| II                                | 3                                | 4                                                  | 1                                             | 5                                                             | 0                                                                 |
| III                               | 0                                | 0                                                  | 0                                             | 4                                                             | 2                                                                 |
| IV                                | 0                                | 3                                                  | 0                                             | 3                                                             | 1                                                                 |
| <b>Tumor regression<br/>grade</b> |                                  |                                                    |                                               |                                                               |                                                                   |
| 1                                 | 3                                | 5                                                  | 0                                             | 10                                                            | 1                                                                 |
| 2                                 | 0                                | 3                                                  | 0                                             | 3                                                             | 1                                                                 |
| 3                                 | 0                                | 0                                                  | 1                                             | 1                                                             | 1                                                                 |

**Table S3.** Clinicopathologic characteristics of patients in flow cytometry cohort.

| <b>Variable</b>   | <b>PR (n = 44)<br/>n (%)</b> | <b>NEO (n = 27)<br/>n (%)</b> | <b>p value</b> |
|-------------------|------------------------------|-------------------------------|----------------|
| <b>Age</b>        |                              |                               |                |
| Median (Range)    | 69 (45-84)                   | 65 (50-81)                    | 0.1089         |
| <b>Sex</b>        |                              |                               |                |
| Male              | 22 (50)                      | 13 (48)                       | 0.9999         |
| Female            | 22 (50)                      | 14 (52)                       |                |
| <b>pT</b>         |                              |                               |                |
| 1                 | 4 (9)                        | 2 (8)                         | 0.5120         |
| 2                 | 21 (48)                      | 13 (48)                       |                |
| 3                 | 18 (41)                      | 9 (33)                        |                |
| 4                 | 1 (2)                        | 3 (11)                        |                |
| <b>pN</b>         |                              |                               |                |
| 0                 | 12 (27)                      | 9 (33)                        | 0.3714         |
| 1                 | 17 (39)                      | 13 (48)                       |                |
| 2                 | 15 (34)                      | 5 (19)                        |                |
| <b>pM</b>         |                              |                               |                |
| 0                 | 40 (91)                      | 20 (74)                       | 0.2563         |
| 1                 | 4 (9)                        | 7 (26)                        |                |
| <b>UICC Stage</b> |                              |                               |                |
| I                 | 5 (12)                       | 4 (15)                        | 0.0896         |
| II                | 23 (52)                      | 11 (41)                       |                |
| III               | 12 (27)                      | 5 (18)                        |                |
| IV                | 4 (9)                        | 7 (26)                        |                |

**Table S4.** Clinicopathologic characteristics of neoadjuvantly treated patients in flow cytometry cohort. FOLFIRINOX or FOLFOXIRI, folinic acid, 5-fluorouracil, oxaliplatin, and irinotecan; Gem, gemcitabine; Nab-Pac, nab-paclitaxel.

| <b>Variable</b>               | <b>FOLFIRINOX or<br/>FOLFOXIRI<br/>(n = 16)</b> | <b>Gem<br/>+<br/>Nab-P<br/>(n = 8)</b> | <b>Both<br/>(n = 3)</b> |
|-------------------------------|-------------------------------------------------|----------------------------------------|-------------------------|
| <b>Age</b>                    |                                                 |                                        |                         |
| Median (Range)                | 65 (50-76)                                      | 73 (59-81)                             | 68 (67-68)              |
| <b>Gender</b>                 |                                                 |                                        |                         |
| Male                          | 8                                               | 3                                      | 2                       |
| Female                        | 8                                               | 5                                      | 1                       |
| <b>UICC Stage</b>             |                                                 |                                        |                         |
| I                             | 2                                               | 2                                      | 0                       |
| II                            | 6                                               | 3                                      | 1                       |
| III                           | 5                                               | 0                                      | 0                       |
| IV                            | 3                                               | 3                                      | 2                       |
| <b>Tumor regression grade</b> |                                                 |                                        |                         |
| 1                             | 11                                              | 4                                      | 2                       |
| 2                             | 3                                               | 3                                      | 1                       |
| 3                             | 2                                               | 1                                      | 0                       |

**Table S5.** Clinicopathologic characteristics of patients used for t-SNE analysis. FOLFIRINOX or FOLFOXIRI, folinic acid, 5-fluorouracil, oxaliplatin, and irinotecan; Gem, gemcitabine; Nab-Pac, nab-paclitaxel.

| <b>Variable</b>               | <b>PR (n = 8)<br/>n (%)</b> | <b>NEO (n = 8)<br/>n (%)</b> | <b>p value</b> |
|-------------------------------|-----------------------------|------------------------------|----------------|
| <b>Age</b>                    |                             |                              |                |
| Median (Range)                | 73 (45-80)                  | 67 (56-81)                   | 0.7209         |
| <b>Gender</b>                 |                             |                              |                |
| Male                          | 4 (50)                      | 3 (37.5)                     | 0.9999         |
| Female                        | 4 (50)                      | 5 (62.5)                     |                |
| <b>pT</b>                     |                             |                              |                |
| 1                             | 0 (0)                       | 0 (0)                        | 0.3256         |
| 2                             | 6 (75)                      | 3 (37.5)                     |                |
| 3                             | 2 (25)                      | 5 (62.5)                     |                |
| 4                             | 0 (0)                       | 0 (0)                        |                |
| <b>pN</b>                     |                             |                              |                |
| 0                             | 1 (12.5)                    | 4 (50)                       | 0.3147         |
| 1                             | 4 (50)                      | 3 (37.5)                     |                |
| 2                             | 3 (37.5)                    | 1 (12.5)                     |                |
| <b>pM</b>                     |                             |                              |                |
| 0                             | 7 (87.5)                    | 7 (87.5)                     | 1              |
| 1                             | 1 (12.5)                    | 1 (12.5)                     |                |
| <b>UICC Stage</b>             |                             |                              |                |
| I                             | 0 (0)                       | 2 (25)                       | 0.5214         |
| II                            | 4 (50)                      | 4 (50)                       |                |
| III                           | 3 (37.5)                    | 1 (12.5)                     |                |
| IV                            | 1 (12.5)                    | 1 (12.5)                     |                |
| <b>Tumor regression grade</b> |                             |                              |                |
| 1                             |                             | 3                            |                |
| 2                             |                             | 3                            |                |
| 3                             |                             | 2                            |                |
| <b>Neoadjuvant treatment</b>  |                             |                              |                |
| FOLFIRINOX or FOLFOXIRI       |                             | 6                            |                |
| Gem + Nab-Pac                 |                             | 2                            |                |
